# Supplementary material
Source: publisher site journal article supplement (https://www.dovepress.com/article/590108)
Supplement: Supplementary file 1 [file 590108_Supplementary%20tables.docx]

**Table S1. Side-by-side comparison of video-based assessment (VBA) versus traditional clinical assessment (TCA) for T-tube nursing competency**

| Domain | VBA (video-based assessment) | TCA (traditional clinical assessment) |
| --- | --- | --- |
| Training content | Structured didactic module + guided practice; self-practice prior to submission; standardized protocol emphasis | Standard ward orientation + bedside teaching; protocol review and demonstration by senior staff; supervised practice during routine shifts |
| Assessment format | Self-recorded demonstration; secure submission; asynchronous review | In-person bedside observation during routine work; real-time sign-off |
| Scoring criteria | Predefined rubric/checklist; item-level anchors; pass threshold | Pass/fail or brief checklist-based confirmation; fewer item-level anchors |
| Assessor identity | Designated credentialing reviewers; assessment can be anonymized | Ward educator/senior nurse/charge nurse/nurse manager (per routine departmental practice) |
| Assessor training / calibration | Rubric-based review with planned calibration to improve inter-rater consistency | Variable; typically based on local practice and assessor experience; formal calibration not routinely applied |
| Timing / frequency | Scheduled within credentialing window; resubmission possible if needed | Conducted during orientation/competency checks; reassessment as needed |
| Documentation / audit trail | Digital record of video + scoring sheet retained; auditable | Competency sign-off in ward training log; limited ability for subsequent review |
| Feedback mechanism | Written rubric-based feedback; targeted remediation guidance | Real-time verbal feedback; remediation at assessor discretion |
| Remediation / retest policy | Structured remediation and resubmission until pass | Additional supervised practice and repeat bedside sign-off if required |
| What differs most | Standardization, traceability, asynchronous review, potential for assessor calibration | Real-time assessment, less standardized scoring, limited traceability |

**Table S2. Exclusions by group and reason**

| Exclusion category | VBA (n = 10) | TCA (n = 16) | Unknown group status (n = 8) | Total |
| --- | --- | --- | --- | --- |
| Early discharge | 3 | 4 | 1 | 8 |
| Incomplete documentation | 1 | 2 | 1 | 4 |
| Missing satisfaction data | 5 | 9 | 6 | 20 |
| Other / combined reasons | 1 | 1 | 0 | 2 |
| Total excluded | **10** | **16** | **8** | **34** |

**Group status for excluded patients was reconstructed where feasible by cross-referencing staffing records and the VBA credentialing roster; patients whose status could not be reliably reconstructed were classified as “Unknown”. Reasons for exclusion were not mutually exclusive; “Other/combined reasons” captures records with overlapping documentation issues not otherwise categorized.**

**Table S3. Extreme-case sensitivity analysis for missing satisfaction data across core patient-reported domains**

**Observed complete-case means:**

- Communication with nursing staff: VBA 4.6 vs TCA 4.2
- Timeliness of care: VBA 4.5 vs TCA 4.0
- Ward hygiene: VBA 4.5 vs TCA 4.1
- Adequacy of pain control: VBA 4.3 vs TCA 3.9

**Assumed missing satisfaction counts with reconstructed group status:** VBA = 5, TCA = 9.

| Domain | Scenario | VBA mean | TCA mean | Mean difference (VBA − TCA) | Direction preserved? |
| --- | --- | --- | --- | --- | --- |
| Communication with nursing staff | Complete-case (observed) | 4.60 | 4.20 | +0.40 | Yes |
|  | Best–worst | 4.62 | 3.98 | +0.64 | Yes |
|  | Worst–best | 4.39 | 4.26 | +0.13 | Yes |
| Timeliness of care | Complete-case (observed) | 4.50 | 4.00 | +0.50 | Yes |
|  | Best–worst | 4.53 | 3.79 | +0.74 | Yes |
|  | Worst–best | 4.29 | 4.07 | +0.22 | Yes |
| Ward hygiene | Complete-case (observed) | 4.50 | 4.10 | +0.40 | Yes |
|  | Best–worst | 4.53 | 3.89 | +0.64 | Yes |
|  | Worst–best | 4.29 | 4.17 | +0.12 | Yes |
| Adequacy of pain control | Complete-case (observed) | 4.30 | 3.90 | +0.40 | Yes |
|  | Best–worst | 4.34 | 3.70 | +0.64 | Yes |
|  | Worst–best | 4.11 | 3.98 | +0.13 | Yes |

**This extreme-case sensitivity analysis evaluates robustness of patient-reported satisfaction findings to missingness by assigning boundary values on the 1–5 scale. In the best–worst scenario, all missing VBA values were assigned 5 and all missing TCA values were assigned 1; in the worst–best scenario, all missing VBA values were assigned 1 and all missing TCA values were assigned 5. Missing satisfaction counts used here were VBA = 5 and TCA = 9 (reconstructed group status available). Across all four core domains, the direction of the between-group difference remained unchanged, although the magnitude was attenuated under the worst–best scenario.**

**Supplementary Table S4 presents the STROBE checklist for this retrospective observational comparative study, with manuscript locations indicating where each reporting item is addressed.**

**Table S4. STROBE checklist**

| Section/Topic | Item No. | Recommendation | Reported in manuscript |
| --- | --- | --- | --- |
| Title and abstract | 1(a) | Indicate the study’s design with a commonly used term in the title or the abstract | Title: “A Single-Center Retrospective Comparative Study”; Abstract Methods: “We conducted a retrospective comparative analysis…” |
|  | 1(b) | Provide in the abstract an informative and balanced summary of what was done and what was found | Abstract: Background, Methods, Results, Conclusion |
| Introduction | 2 | Explain the scientific background and rationale for the investigation being reported | Introduction, paragraphs 1–3 |
|  | 3 | State specific objectives, including any prespecified hypotheses | Introduction, final paragraph; Methods, Outcomes |
| Methods | 4 | Present key elements of study design early in the paper | Methods, Study design / retrospective comparative analysis |
|  | 5 | Describe the setting, locations, and relevant dates, including periods of recruitment, exposure, follow-up, and data collection | Methods, Study Design and Context; Implementation timeline |
|  | 6(a) | Give the eligibility criteria, and the sources and methods of selection of participants | Methods, Patient inclusion / exclusion criteria; Figure 1 legend |
|  | 6(b) | For matched studies, give matching criteria and number of exposed and unexposed | Not applicable (no matching design used) |
|  | 7 | Clearly define all outcomes, exposures, predictors, potential confounders, and effect modifiers | Methods, Nursing Assessment Model and Group Definition; Clinical Outcomes and Scoring Instruments; Outcomes; Bias and confounding |
|  | 8 | For each variable of interest, give sources of data and details of methods of assessment | Methods, Clinical Outcomes and Scoring Instruments; Data extraction / record review description |
|  | 9 | Describe any efforts to address potential sources of bias | Methods, Group assignment reconstruction and exclusions; Statistical Analysis; Discussion, Bias and confounding |
|  | 10 | Explain how the study size was arrived at | Methods/Results: all eligible patients meeting criteria during January 2019–December 2023 were screened; Discussion/Limitations addresses precision for rare complications |
|  | 11 | Explain how quantitative variables were handled in the analyses; if applicable, describe which groupings were chosen and why | Methods, Clinical Outcomes and Scoring Instruments; Statistical Analysis |
|  | 12(a) | Describe all statistical methods, including those used to control for confounding | Methods, Statistical Analysis (multivariable adjustment, calendar time, E-value sensitivity analysis) |
|  | 12(b) | Describe any methods used to examine subgroups and interactions | Not applicable / no prespecified subgroup interaction analyses performed |
|  | 12(c) | Explain how missing data were addressed | Methods, Group assignment reconstruction and exclusions; Statistical Analysis; Table S2/Table S3 |
|  | 12(d) | If applicable, explain how loss to follow-up was addressed | Not applicable (retrospective inpatient cohort; no longitudinal follow-up design) |
|  | 12(e) | Describe any sensitivity analyses | Methods, Statistical Analysis (E-value); Results, sensitivity analysis for missing satisfaction data; Table S3 |
| Results | 13(a) | Report numbers of individuals at each stage of the study | Figure 1 legend; Results, cohort description |
|  | 13(b) | Give reasons for non-participation at each stage | Figure 1 legend; Table S2 |
|  | 13(c) | Consider use of a flow diagram | Figure 1 |
|  | 14(a) | Give characteristics of study participants and information on exposures and potential confounders | Table 1 |
|  | 14(b) | Indicate number of participants with missing data for each variable of interest | Table S2; Table S3; Methods/Results missing-data description |
|  | 14(c) | Summarize follow-up time | Not applicable in the conventional longitudinal sense; inpatient/postoperative observation period described in Methods |
|  | 15 | Report numbers of outcome events or summary measures over time | Table 2; Table 3; Results sections |
|  | 16(a) | Give unadjusted estimates and, if applicable, confounder-adjusted estimates and their precision (e.g., 95% CI) | Table 2; Results, Primary Clinical Outcomes |
|  | 16(b) | Report category boundaries when continuous variables were categorized | Methods, definition of optimal T-tube removal clustering (42–45 days) |
|  | 16(c) | If relevant, consider translating estimates of relative risk into absolute risk for a meaningful time period | Absolute event counts and percentages reported in Table 2/Results |
|  | 17 | Report other analyses done (e.g., subgroup analyses, sensitivity analyses) | Results: E-value sensitivity analysis; missing satisfaction sensitivity analysis; Table S3 |
| Discussion | 18 | Summarize key results with reference to study objectives | Discussion, opening paragraphs |
|  | 19 | Discuss limitations of the study, taking into account sources of potential bias or imprecision | Discussion, Limitations; Bias and confounding |
|  | 20 | Give a cautious overall interpretation of results considering objectives, limitations, multiplicity of analyses, results from similar studies, and other relevant evidence | Discussion, interpretation paragraphs; Conclusion |
|  | 21 | Discuss the generalizability (external validity) of the study results | Discussion, final paragraph / future research |
| Other information | 22 | Give the source of funding and the role of the funders | Statements and Declarations, Funding |
